# Supplementary material
Source: publisher figshare collection journal article supplement (https://acs.figshare.com/ndownloader/files/5119102)
Supplement: Supplementary file 1 [file 5119102]

 
data_ge2br2 
 
_audit_creation_method            SHELXL-97 
_chemical_name_systematic 
; 
 ? 
; 
_chemical_name_common             1,2-dibromodigermene 
_chemical_melting_point           ? 
_chemical_formula_moiety          'C30 H67 Br Ge Si7, C7 H8' 
_chemical_formula_sum 
 'C74 H150 Br2 Ge2 Si14' 
_chemical_formula_weight          1738.20 
 
loop_ 
 _atom_type_symbol 
 _atom_type_description 
 _atom_type_scat_dispersion_real 
 _atom_type_scat_dispersion_imag 
 _atom_type_scat_source 
 'C'  'C'   0.0033   0.0016 
 'International Tables Vol C Tables 4.2.6.8 and 6.1.1.4' 
 'H'  'H'   0.0000   0.0000 
 'International Tables Vol C Tables 4.2.6.8 and 6.1.1.4' 
 'Br'  'Br'  -0.2901   2.4595 
 'International Tables Vol C Tables 4.2.6.8 and 6.1.1.4' 
 'Ge'  'Ge'   0.1547   1.8001 
 'International Tables Vol C Tables 4.2.6.8 and 6.1.1.4' 
 'Si'  'Si'   0.0817   0.0704 
 'International Tables Vol C Tables 4.2.6.8 and 6.1.1.4' 
 
_symmetry_cell_setting                 monoclinic
_symmetry_space_group_name_H-M        'P 21/n'
_symmetry_space_group_name_Hall       '-P 2yn'
_symmetry_Int_Tables_number            14
 
loop_ 
 _symmetry_equiv_pos_as_xyz 
 'x, y, z' 
 '-x+1/2, y+1/2, -z+1/2' 
 '-x, -y, -z' 
 'x-1/2, -y-1/2, z-1/2' 
 
_cell_length_a                    16.0618(3) 
_cell_length_b                    13.2169(3) 
_cell_length_c                    23.3214(6) 
_cell_angle_alpha                 90.00 
_cell_angle_beta                  107.7839(13) 
_cell_angle_gamma                 90.00 
_cell_volume                      4714.26(18) 
_cell_formula_units_Z             2 
_cell_measurement_temperature     103(2) 
 
_exptl_crystal_description        'prism' 
_exptl_crystal_colour             'orange' 
_exptl_crystal_size_max           0.20 
_exptl_crystal_size_mid           0.10 
_exptl_crystal_size_min           0.05 
_exptl_crystal_density_diffrn     1.225 
_exptl_crystal_density_method     'not measured' 
_exptl_crystal_F_000              1848 
_exptl_absorpt_coefficient_mu     1.699 
_exptl_absorpt_correction_type    multi-scan 
_exptl_absorpt_correction_T_min   0.7275 
_exptl_absorpt_correction_T_max   0.9199 
_exptl_absorpt_process_details         
'Jacobson, R. (1998) Private communication'

 
_diffrn_ambient_temperature       103(2) 
_diffrn_radiation_wavelength      0.71069 
_diffrn_radiation_type            MoK\a 
_diffrn_radiation_source          'fine-focus sealed tube' 
_diffrn_radiation_monochromator   graphite 
_diffrn_measurement_device_type   'Rigaku Mercury'  
_diffrn_measurement_method        \w 
_diffrn_detector_area_resol_mean  7.31  
_diffrn_reflns_number             40395 
_diffrn_reflns_av_R_equivalents   0.0610 
_diffrn_reflns_av_sigmaI/netI     0.0582 
_diffrn_reflns_limit_h_min        -19 
_diffrn_reflns_limit_h_max        19 
_diffrn_reflns_limit_k_min        -16 
_diffrn_reflns_limit_k_max        16 
_diffrn_reflns_limit_l_min        -28 
_diffrn_reflns_limit_l_max        28 
_diffrn_reflns_theta_min          2.39 
_diffrn_reflns_theta_max          25.50 
_reflns_number_total              8733 
_reflns_number_gt                 6403 
_reflns_threshold_expression      >2sigma(I) 
 
_computing_data_collection        'CrystalClear'  
_computing_cell_refinement        'HKL 2000'  
_computing_data_reduction         'HKL 2000' 
_computing_structure_solution     'SHELXS-97 (Sheldrick, 1990)' 
_computing_structure_refinement   'SHELXL-97 (Sheldrick, 1997)' 
_computing_molecular_graphics     'Yadokari-XG' 
_computing_publication_material   ? 
 
_refine_special_details 
; 
 Refinement of F^2^ against ALL reflections.  The weighted R-factor wR and 
 goodness of fit S are based on F^2^, conventional R-factors R are based 
 on F, with F set to zero for negative F^2^. The threshold expression of 
 F^2^ > 2sigma(F^2^) is used only for calculating R-factors(gt) etc. and is 
 not relevant to the choice of reflections for refinement.  R-factors based 
 on F^2^ are statistically about twice as large as those based on F, and R- 
 factors based on ALL data will be even larger. 
; 
 
_refine_ls_structure_factor_coef  Fsqd  
_refine_ls_matrix_type            full 
_refine_ls_weighting_scheme       calc  
_refine_ls_weighting_details 
 'calc w=1/[\s^2^(Fo^2^)+(0.0335P)^2^+6.2151P] where P=(Fo^2^+2Fc^2^)/3' 
_atom_sites_solution_primary      direct 
_atom_sites_solution_secondary    difmap 
_atom_sites_solution_hydrogens    geom 
_refine_ls_hydrogen_treatment     constr
_refine_ls_extinction_method      none 
_refine_ls_extinction_coef        ? 
_refine_ls_number_reflns          8733 
_refine_ls_number_parameters      455 
_refine_ls_number_restraints      0 
_refine_ls_R_factor_all           0.0713 
_refine_ls_R_factor_gt            0.0423 
_refine_ls_wR_factor_ref          0.0946 
_refine_ls_wR_factor_gt           0.0859 
_refine_ls_goodness_of_fit_ref    1.060 
_refine_ls_restrained_S_all       1.060 
_refine_ls_shift/su_max           0.002 
_refine_ls_shift/su_mean          0.000 
 
loop_ 
 _atom_site_label 
 _atom_site_type_symbol 
 _atom_site_fract_x 
 _atom_site_fract_y 
 _atom_site_fract_z 
 _atom_site_U_iso_or_equiv 
 _atom_site_adp_type 
 _atom_site_occupancy 
 _atom_site_symmetry_multiplicity 
 _atom_site_calc_flag 
 _atom_site_refinement_flags 
 _atom_site_disorder_assembly 
 _atom_site_disorder_group 
Ge1 Ge 0.53255(2) 0.05712(3) 0.969573(16) 0.01453(10) Uani 1 1 d . . . 
Br1 Br 0.68563(2) 0.04349(3) 1.014149(17) 0.02549(11) Uani 1 1 d . . . 
C1 C 0.5246(2) 0.0427(2) 0.88343(15) 0.0130(7) Uani 1 1 d . . . 
C2 C 0.5299(2) -0.0494(3) 0.85476(15) 0.0134(7) Uani 1 1 d . . . 
C3 C 0.5234(2) -0.0485(3) 0.79338(15) 0.0146(7) Uani 1 1 d . . . 
H1 H 0.5251 -0.1114 0.7741 0.018 Uiso 1 1 calc R . . 
C4 C 0.5145(2) 0.0392(3) 0.75933(15) 0.0133(7) Uani 1 1 d . A . 
C5 C 0.5126(2) 0.1302(3) 0.79003(15) 0.0153(8) Uani 1 1 d . . . 
H2 H 0.5081 0.1920 0.7685 0.018 Uiso 1 1 calc R . . 
C6 C 0.5168(2) 0.1343(2) 0.85072(15) 0.0131(7) Uani 1 1 d . . . 
C7 C 0.5416(2) -0.1496(2) 0.88774(16) 0.0142(7) Uani 1 1 d . . . 
H3 H 0.5438 -0.1298 0.9296 0.017 Uiso 1 1 calc R . . 
C8 C 0.5059(2) 0.0391(3) 0.69110(15) 0.0162(8) Uani 1 1 d . . . 
C9 C 0.5138(2) 0.2362(2) 0.88106(15) 0.0141(8) Uani 1 1 d . . . 
H4 H 0.5278 0.2181 0.9246 0.017 Uiso 1 1 calc R . . 
Si1 Si 0.43768(7) -0.22875(7) 0.86095(5) 0.0176(2) Uani 1 1 d . . . 
Si2 Si 0.65257(7) -0.21120(7) 0.89856(5) 0.0175(2) Uani 1 1 d . . . 
Si3 Si 0.49290(7) -0.09547(8) 0.65633(5) 0.0192(3) Uani 0.942(2) 1 d P A 1 
Si4 Si 0.60889(7) 0.09863(8) 0.67992(5) 0.0181(3) Uani 0.942(2) 1 d P A 1 
Si5 Si 0.40093(7) 0.11443(8) 0.64992(5) 0.0193(3) Uani 0.942(2) 1 d P A 1 
Si6 Si 0.39768(7) 0.28677(7) 0.86133(5) 0.0173(2) Uani 1 1 d . . . 
Si7 Si 0.60536(7) 0.32670(7) 0.88002(5) 0.0178(2) Uani 1 1 d . . . 
C10 C 0.3445(2) -0.1385(3) 0.84185(17) 0.0243(9) Uani 1 1 d . . . 
H5 H 0.3418 -0.1030 0.8045 0.036 Uiso 1 1 calc R . . 
H6 H 0.3526 -0.0893 0.8745 0.036 Uiso 1 1 calc R . . 
H7 H 0.2898 -0.1757 0.8365 0.036 Uiso 1 1 calc R . . 
C11 C 0.4347(3) -0.3112(3) 0.92539(17) 0.0253(9) Uani 1 1 d . . . 
H8 H 0.3822 -0.3537 0.9133 0.038 Uiso 1 1 calc R . . 
H9 H 0.4335 -0.2688 0.9596 0.038 Uiso 1 1 calc R . . 
H10 H 0.4868 -0.3543 0.9371 0.038 Uiso 1 1 calc R . . 
C12 C 0.4260(3) -0.3123(3) 0.79456(17) 0.0257(9) Uani 1 1 d . . . 
H11 H 0.3641 -0.3290 0.7759 0.039 Uiso 1 1 calc R . . 
H12 H 0.4595 -0.3746 0.8076 0.039 Uiso 1 1 calc R . . 
H13 H 0.4482 -0.2771 0.7652 0.039 Uiso 1 1 calc R . . 
C13 C 0.6990(3) -0.2524(3) 0.97860(17) 0.0271(9) Uani 1 1 d . . . 
H14 H 0.7541 -0.2884 0.9837 0.041 Uiso 1 1 calc R . . 
H15 H 0.6575 -0.2975 0.9891 0.041 Uiso 1 1 calc R . . 
H16 H 0.7097 -0.1930 1.0050 0.041 Uiso 1 1 calc R . . 
C14 C 0.6469(3) -0.3276(3) 0.85213(18) 0.0269(9) Uani 1 1 d . . . 
H17 H 0.6241 -0.3101 0.8093 0.040 Uiso 1 1 calc R . . 
H18 H 0.6081 -0.3771 0.8622 0.040 Uiso 1 1 calc R . . 
H19 H 0.7055 -0.3566 0.8605 0.040 Uiso 1 1 calc R . . 
C15 C 0.7291(2) -0.1187(3) 0.88145(18) 0.0233(9) Uani 1 1 d . . . 
H20 H 0.7878 -0.1482 0.8920 0.035 Uiso 1 1 calc R . . 
H21 H 0.7307 -0.0569 0.9050 0.035 Uiso 1 1 calc R . . 
H22 H 0.7091 -0.1023 0.8384 0.035 Uiso 1 1 calc R . . 
C16 C 0.3842(3) -0.1500(3) 0.65506(18) 0.0297(10) Uani 1 1 d . . . 
H23 H 0.3790 -0.1489 0.6958 0.044 Uiso 0.942(2) 1 calc PR A 1 
H24 H 0.3800 -0.2200 0.6405 0.044 Uiso 0.942(2) 1 calc PR A 1 
H25 H 0.3371 -0.1097 0.6282 0.044 Uiso 0.942(2) 1 calc PR A 1 
H26 H 0.3242 -0.1710 0.6338 0.044 Uiso 0.058(2) 1 calc PR A 2 
H27 H 0.3995 -0.1713 0.6973 0.044 Uiso 0.058(2) 1 calc PR A 2 
H28 H 0.4244 -0.1817 0.6361 0.044 Uiso 0.058(2) 1 calc PR A 2 
C17 C 0.5801(3) -0.1910(3) 0.69572(19) 0.0300(10) Uani 1 1 d . . . 
H29 H 0.5836 -0.1952 0.7383 0.045 Uiso 0.942(2) 1 calc PR A 1 
H30 H 0.6367 -0.1695 0.6923 0.045 Uiso 0.942(2) 1 calc PR A 1 
H31 H 0.5649 -0.2575 0.6769 0.045 Uiso 0.942(2) 1 calc PR A 1 
H32 H 0.6228 -0.2337 0.6849 0.045 Uiso 0.058(2) 1 calc PR A 2 
H33 H 0.5210 -0.2170 0.6762 0.045 Uiso 0.058(2) 1 calc PR A 2 
H34 H 0.5920 -0.1917 0.7395 0.045 Uiso 0.058(2) 1 calc PR A 2 
C18 C 0.4986(3) -0.1003(3) 0.57731(18) 0.0356(11) Uani 1 1 d . . . 
H35 H 0.5547 -0.0725 0.5763 0.053 Uiso 0.942(2) 1 calc PR A 1 
H36 H 0.4507 -0.0603 0.5510 0.053 Uiso 0.942(2) 1 calc PR A 1 
H37 H 0.4934 -0.1706 0.5634 0.053 Uiso 0.942(2) 1 calc PR A 1 
H38 H 0.4926 -0.0376 0.5539 0.053 Uiso 0.058(2) 1 calc PR A 2 
H39 H 0.4409 -0.1222 0.5786 0.053 Uiso 0.058(2) 1 calc PR A 2 
H40 H 0.5241 -0.1531 0.5583 0.053 Uiso 0.058(2) 1 calc PR A 2 
C19 C 0.7054(3) 0.0142(4) 0.7136(2) 0.0429(12) Uani 1 1 d . . . 
H41 H 0.6927 -0.0539 0.6965 0.064 Uiso 0.942(2) 1 calc PR A 1 
H42 H 0.7170 0.0109 0.7574 0.064 Uiso 0.942(2) 1 calc PR A 1 
H43 H 0.7567 0.0414 0.7046 0.064 Uiso 0.942(2) 1 calc PR A 1 
H44 H 0.6991 0.0820 0.6958 0.064 Uiso 0.058(2) 1 calc PR A 2 
H45 H 0.7554 -0.0201 0.7065 0.064 Uiso 0.058(2) 1 calc PR A 2 
H46 H 0.7148 0.0197 0.7571 0.064 Uiso 0.058(2) 1 calc PR A 2 
C20 C 0.5968(3) 0.1219(3) 0.59787(18) 0.0361(11) Uani 1 1 d . . . 
H47 H 0.5786 0.0592 0.5751 0.054 Uiso 0.942(2) 1 calc PR A 1 
H48 H 0.6529 0.1443 0.5938 0.054 Uiso 0.942(2) 1 calc PR A 1 
H49 H 0.5525 0.1744 0.5821 0.054 Uiso 0.942(2) 1 calc PR A 1 
H50 H 0.5520 0.0860 0.5663 0.054 Uiso 0.058(2) 1 calc PR A 2 
H51 H 0.6478 0.0780 0.6136 0.054 Uiso 0.058(2) 1 calc PR A 2 
H52 H 0.6141 0.1834 0.5810 0.054 Uiso 0.058(2) 1 calc PR A 2 
C21 C 0.6436(3) 0.2230(3) 0.71710(19) 0.0323(10) Uani 1 1 d . . . 
H53 H 0.5965 0.2724 0.7020 0.048 Uiso 0.942(2) 1 calc PR A 1 
H54 H 0.6961 0.2464 0.7081 0.048 Uiso 0.942(2) 1 calc PR A 1 
H55 H 0.6564 0.2155 0.7608 0.048 Uiso 0.942(2) 1 calc PR A 1 
H56 H 0.6570 0.2840 0.6978 0.048 Uiso 0.058(2) 1 calc PR A 2 
H57 H 0.6938 0.1769 0.7265 0.048 Uiso 0.058(2) 1 calc PR A 2 
H58 H 0.6313 0.2416 0.7544 0.048 Uiso 0.058(2) 1 calc PR A 2 
C22 C 0.3502(3) 0.0832(3) 0.56810(17) 0.0352(11) Uani 1 1 d . . . 
H59 H 0.3926 0.0957 0.5464 0.053 Uiso 0.942(2) 1 calc PR A 1 
H60 H 0.2985 0.1258 0.5512 0.053 Uiso 0.942(2) 1 calc PR A 1 
H61 H 0.3328 0.0118 0.5640 0.053 Uiso 0.942(2) 1 calc PR A 1 
H62 H 0.2901 0.0633 0.5461 0.053 Uiso 0.058(2) 1 calc PR A 2 
H63 H 0.3884 0.0680 0.5436 0.053 Uiso 0.058(2) 1 calc PR A 2 
H64 H 0.3520 0.1559 0.5766 0.053 Uiso 0.058(2) 1 calc PR A 2 
C23 C 0.4183(3) 0.2551(3) 0.64736(18) 0.0293(10) Uani 1 1 d . . . 
H65 H 0.4637 0.2687 0.6283 0.044 Uiso 0.942(2) 1 calc PR A 1 
H66 H 0.4365 0.2823 0.6884 0.044 Uiso 0.942(2) 1 calc PR A 1 
H67 H 0.3636 0.2875 0.6240 0.044 Uiso 0.942(2) 1 calc PR A 1 
H68 H 0.3695 0.2176 0.6201 0.044 Uiso 0.058(2) 1 calc PR A 2 
H69 H 0.4254 0.3198 0.6288 0.044 Uiso 0.058(2) 1 calc PR A 2 
H70 H 0.4062 0.2677 0.6855 0.044 Uiso 0.058(2) 1 calc PR A 2 
C24 C 0.3143(2) 0.0877(3) 0.68638(18) 0.0270(9) Uani 1 1 d . . . 
H71 H 0.3370 0.1024 0.7296 0.041 Uiso 0.942(2) 1 calc PR A 1 
H72 H 0.2973 0.0163 0.6806 0.041 Uiso 0.942(2) 1 calc PR A 1 
H73 H 0.2632 0.1304 0.6681 0.041 Uiso 0.942(2) 1 calc PR A 1 
H74 H 0.2529 0.0699 0.6666 0.041 Uiso 0.058(2) 1 calc PR A 2 
H75 H 0.3233 0.1595 0.6796 0.041 Uiso 0.058(2) 1 calc PR A 2 
H76 H 0.3289 0.0748 0.7297 0.041 Uiso 0.058(2) 1 calc PR A 2 
C25 C 0.3540(3) 0.3359(3) 0.78315(17) 0.0296(10) Uani 1 1 d . . . 
H77 H 0.2932 0.3575 0.7757 0.044 Uiso 1 1 calc R . . 
H78 H 0.3565 0.2825 0.7546 0.044 Uiso 1 1 calc R . . 
H79 H 0.3892 0.3938 0.7780 0.044 Uiso 1 1 calc R . . 
C26 C 0.3262(2) 0.1802(3) 0.86969(18) 0.0253(9) Uani 1 1 d . . . 
H80 H 0.3486 0.1519 0.9103 0.038 Uiso 1 1 calc R . . 
H81 H 0.3258 0.1276 0.8400 0.038 Uiso 1 1 calc R . . 
H82 H 0.2665 0.2052 0.8631 0.038 Uiso 1 1 calc R . . 
C27 C 0.3946(3) 0.3938(3) 0.91306(17) 0.0236(9) Uani 1 1 d . . . 
H83 H 0.4190 0.4547 0.9003 0.035 Uiso 1 1 calc R . . 
H84 H 0.4292 0.3762 0.9543 0.035 Uiso 1 1 calc R . . 
H85 H 0.3340 0.4067 0.9117 0.035 Uiso 1 1 calc R . . 
C28 C 0.5770(3) 0.4042(3) 0.80954(16) 0.0233(9) Uani 1 1 d . . . 
H86 H 0.6294 0.4392 0.8067 0.035 Uiso 1 1 calc R . . 
H87 H 0.5324 0.4542 0.8105 0.035 Uiso 1 1 calc R . . 
H88 H 0.5544 0.3599 0.7745 0.035 Uiso 1 1 calc R . . 
C29 C 0.6258(3) 0.4181(3) 0.94402(17) 0.0276(9) Uani 1 1 d . . . 
H89 H 0.6400 0.3807 0.9821 0.041 Uiso 1 1 calc R . . 
H90 H 0.5734 0.4591 0.9393 0.041 Uiso 1 1 calc R . . 
H91 H 0.6749 0.4622 0.9442 0.041 Uiso 1 1 calc R . . 
C30 C 0.7076(3) 0.2527(3) 0.89107(19) 0.0291(10) Uani 1 1 d . . . 
H92 H 0.6970 0.1981 0.8613 0.044 Uiso 1 1 calc R . . 
H93 H 0.7262 0.2238 0.9317 0.044 Uiso 1 1 calc R . . 
H94 H 0.7536 0.2973 0.8860 0.044 Uiso 1 1 calc R . . 
Si8 Si 0.3936(13) 0.0010(14) 0.6510(9) 0.024(5) Uani 0.058(2) 1 d P A 2 
Si9 Si 0.5875(12) -0.0725(14) 0.6727(8) 0.024(5) Uani 0.058(2) 1 d P A 2 
Si10 Si 0.5474(12) 0.1598(13) 0.6658(8) 0.018(5) Uani 0.058(2) 1 d P A 2 
C31 C -0.0244(3) 0.1067(3) 0.94528(18) 0.0295(10) Uani 1 1 d . . . 
C32 C 0.0632(3) 0.1109(3) 0.9474(2) 0.0344(11) Uani 1 1 d . . . 
H95 H 0.1053 0.1391 0.9817 0.041 Uiso 1 1 calc R . . 
C33 C 0.0893(3) 0.0743(3) 0.8999(2) 0.0403(12) Uani 1 1 d . . . 
H96 H 0.1491 0.0783 0.9016 0.048 Uiso 1 1 calc R . . 
C34 C 0.0296(4) 0.0325(3) 0.8504(2) 0.0418(12) Uani 1 1 d . . . 
H97 H 0.0477 0.0072 0.8180 0.050 Uiso 1 1 calc R . . 
C35 C -0.0559(3) 0.0277(3) 0.8484(2) 0.0423(12) Uani 1 1 d . . . 
H98 H -0.0975 -0.0016 0.8143 0.051 Uiso 1 1 calc R . . 
C36 C -0.0831(3) 0.0645(3) 0.8948(2) 0.0349(11) Uani 1 1 d . . . 
H99 H -0.1432 0.0610 0.8922 0.042 Uiso 1 1 calc R . . 
C37 C -0.0534(4) 0.1464(4) 0.9965(2) 0.0515(14) Uani 1 1 d . . . 
H100 H -0.0028 0.1732 1.0280 0.077 Uiso 1 1 calc R . . 
H101 H -0.0799 0.0914 1.0132 0.077 Uiso 1 1 calc R . . 
H102 H -0.0964 0.2004 0.9819 0.077 Uiso 1 1 calc R . . 
 
loop_ 
 _atom_site_aniso_label 
 _atom_site_aniso_U_11 
 _atom_site_aniso_U_22 
 _atom_site_aniso_U_33 
 _atom_site_aniso_U_23 
 _atom_site_aniso_U_13 
 _atom_site_aniso_U_12 
Ge1 0.0188(2) 0.01265(18) 0.0134(2) -0.00011(16) 0.00677(17) 0.00026(16) 
Br1 0.0193(2) 0.0347(2) 0.0202(2) -0.00016(18) 0.00258(17) -0.00220(18) 
C1 0.0125(18) 0.0135(17) 0.0135(18) -0.0008(14) 0.0049(15) 0.0001(14) 
C2 0.0101(17) 0.0150(17) 0.0150(18) 0.0008(15) 0.0035(15) -0.0008(15) 
C3 0.0152(19) 0.0133(17) 0.0168(19) -0.0043(15) 0.0073(16) -0.0008(15) 
C4 0.0096(18) 0.0178(18) 0.0137(18) -0.0010(15) 0.0050(15) 0.0005(14) 
C5 0.020(2) 0.0130(18) 0.0142(19) 0.0026(14) 0.0068(16) 0.0006(15) 
C6 0.0090(18) 0.0134(17) 0.0167(19) -0.0007(14) 0.0035(16) 0.0002(14) 
C7 0.0183(19) 0.0103(17) 0.0143(18) -0.0039(14) 0.0055(16) -0.0015(15) 
C8 0.020(2) 0.0170(19) 0.0122(18) -0.0014(15) 0.0061(16) -0.0039(15) 
C9 0.0169(19) 0.0135(17) 0.0133(18) 0.0026(14) 0.0069(16) 0.0029(14) 
Si1 0.0205(6) 0.0151(5) 0.0177(5) -0.0010(4) 0.0067(5) -0.0028(4) 
Si2 0.0196(6) 0.0146(5) 0.0201(6) 0.0011(4) 0.0088(5) 0.0022(4) 
Si3 0.0253(7) 0.0179(6) 0.0163(6) -0.0043(5) 0.0091(5) -0.0032(5) 
Si4 0.0188(6) 0.0205(6) 0.0167(6) 0.0015(5) 0.0081(5) -0.0016(5) 
Si5 0.0192(6) 0.0221(6) 0.0156(6) 0.0008(5) 0.0037(5) 0.0025(5) 
Si6 0.0178(5) 0.0153(5) 0.0181(5) -0.0013(4) 0.0047(5) 0.0024(4) 
Si7 0.0199(6) 0.0146(5) 0.0181(5) 0.0002(4) 0.0049(5) -0.0028(4) 
C10 0.021(2) 0.026(2) 0.024(2) -0.0010(17) 0.0026(18) -0.0011(17) 
C11 0.034(2) 0.021(2) 0.021(2) -0.0006(17) 0.0068(19) -0.0103(18) 
C12 0.029(2) 0.021(2) 0.026(2) -0.0077(17) 0.0085(19) -0.0072(17) 
C13 0.029(2) 0.029(2) 0.023(2) 0.0057(18) 0.0080(19) 0.0063(18) 
C14 0.028(2) 0.020(2) 0.035(2) -0.0052(18) 0.012(2) 0.0033(17) 
C15 0.025(2) 0.019(2) 0.029(2) 0.0004(17) 0.0138(19) 0.0006(17) 
C16 0.033(3) 0.027(2) 0.028(2) -0.0056(18) 0.009(2) -0.0112(19) 
C17 0.037(3) 0.024(2) 0.036(2) -0.0065(18) 0.021(2) 0.0033(19) 
C18 0.058(3) 0.028(2) 0.027(2) -0.0080(19) 0.022(2) 0.000(2) 
C19 0.022(2) 0.051(3) 0.056(3) 0.023(3) 0.012(2) -0.001(2) 
C20 0.040(3) 0.045(3) 0.026(2) 0.001(2) 0.014(2) -0.015(2) 
C21 0.033(2) 0.037(2) 0.034(2) -0.012(2) 0.020(2) -0.017(2) 
C22 0.029(2) 0.050(3) 0.020(2) -0.001(2) -0.002(2) -0.002(2) 
C23 0.039(3) 0.024(2) 0.024(2) 0.0090(17) 0.008(2) 0.0076(19) 
C24 0.018(2) 0.035(2) 0.027(2) -0.0013(18) 0.0038(18) 0.0015(18) 
C25 0.024(2) 0.038(2) 0.025(2) 0.0027(19) 0.0031(19) 0.0098(19) 
C26 0.021(2) 0.022(2) 0.033(2) -0.0024(18) 0.0080(19) 0.0027(17) 
C27 0.026(2) 0.019(2) 0.026(2) -0.0019(17) 0.0081(19) 0.0050(17) 
C28 0.032(2) 0.0170(19) 0.022(2) -0.0001(16) 0.0095(19) -0.0055(17) 
C29 0.033(2) 0.024(2) 0.023(2) -0.0024(17) 0.0049(19) -0.0109(18) 
C30 0.020(2) 0.029(2) 0.037(3) 0.0060(19) 0.008(2) -0.0018(18) 
Si8 0.032(12) 0.019(10) 0.027(11) -0.004(8) 0.018(9) 0.013(8) 
Si9 0.020(10) 0.025(10) 0.023(10) 0.008(8) 0.003(8) 0.016(8) 
Si10 0.029(11) 0.014(9) 0.019(10) 0.002(7) 0.017(9) 0.001(8) 
C31 0.041(3) 0.017(2) 0.031(2) 0.0033(18) 0.010(2) 0.0013(19) 
C32 0.037(3) 0.024(2) 0.031(3) 0.0023(19) -0.006(2) -0.005(2) 
C33 0.033(3) 0.033(3) 0.057(3) 0.015(2) 0.019(3) 0.006(2) 
C34 0.067(4) 0.024(2) 0.039(3) 0.005(2) 0.022(3) 0.011(2) 
C35 0.057(3) 0.025(2) 0.035(3) -0.003(2) 0.000(3) -0.001(2) 
C36 0.027(2) 0.022(2) 0.053(3) 0.006(2) 0.008(2) -0.0035(19) 
C37 0.086(4) 0.034(3) 0.046(3) 0.005(2) 0.037(3) 0.009(3) 
 
_geom_special_details 
; 
 All esds (except the esd in the dihedral angle between two l.s. planes) 
 are estimated using the full covariance matrix.  The cell esds are taken 
 into account individually in the estimation of esds in distances, angles 
 and torsion angles; correlations between esds in cell parameters are only 
 used when they are defined by crystal symmetry.  An approximate (isotropic) 
 treatment of cell esds is used for estimating esds involving l.s. planes. 
; 
 
loop_ 
 _geom_bond_atom_site_label_1 
 _geom_bond_atom_site_label_2 
 _geom_bond_distance 
 _geom_bond_site_symmetry_2 
 _geom_bond_publ_flag 
Ge1 C1 1.983(3) . ? 
Ge1 Br1 2.3659(5) . ? 
Ge1 Ge1 2.5087(7) 3_657 ? 
C1 C2 1.404(5) . ? 
C1 C6 1.415(5) . ? 
C2 C3 1.403(5) . ? 
C2 C7 1.514(5) . ? 
C3 C4 1.387(5) . ? 
C3 H1 0.9500 . ? 
C4 C5 1.405(5) . ? 
C4 C8 1.555(5) . ? 
C5 C6 1.397(5) . ? 
C5 H2 0.9500 . ? 
C6 C9 1.530(5) . ? 
C7 Si2 1.906(4) . ? 
C7 Si1 1.906(3) . ? 
C7 H3 1.0000 . ? 
C8 Si8 1.83(2) . ? 
C8 Si10 1.891(17) . ? 
C8 Si4 1.920(4) . ? 
C8 Si3 1.940(4) . ? 
C8 Si5 1.941(4) . ? 
C8 Si9 2.102(17) . ? 
C9 Si6 1.901(3) . ? 
C9 Si7 1.901(3) . ? 
C9 H4 1.0000 . ? 
Si1 C10 1.859(4) . ? 
Si1 C12 1.864(4) . ? 
Si1 C11 1.868(4) . ? 
Si2 C15 1.861(4) . ? 
Si2 C13 1.867(4) . ? 
Si2 C14 1.867(4) . ? 
Si3 C18 1.874(4) . ? 
Si3 C16 1.880(4) . ? 
Si3 C17 1.900(4) . ? 
Si4 C21 1.862(4) . ? 
Si4 C19 1.877(4) . ? 
Si4 C20 1.889(4) . ? 
Si5 C24 1.873(4) . ? 
Si5 C22 1.878(4) . ? 
Si5 C23 1.884(4) . ? 
Si6 C25 1.859(4) . ? 
Si6 C26 1.865(4) . ? 
Si6 C27 1.870(4) . ? 
Si7 C30 1.860(4) . ? 
Si7 C29 1.869(4) . ? 
Si7 C28 1.871(4) . ? 
C10 H5 0.9800 . ? 
C10 H6 0.9800 . ? 
C10 H7 0.9800 . ? 
C11 H8 0.9800 . ? 
C11 H9 0.9800 . ? 
C11 H10 0.9800 . ? 
C12 H11 0.9800 . ? 
C12 H12 0.9800 . ? 
C12 H13 0.9800 . ? 
C13 H14 0.9800 . ? 
C13 H15 0.9800 . ? 
C13 H16 0.9800 . ? 
C14 H17 0.9800 . ? 
C14 H18 0.9800 . ? 
C14 H19 0.9800 . ? 
C15 H20 0.9800 . ? 
C15 H21 0.9800 . ? 
C15 H22 0.9800 . ? 
C16 Si8 2.007(19) . ? 
C16 H23 0.9800 . ? 
C16 H24 0.9800 . ? 
C16 H25 0.9800 . ? 
C16 H26 0.9800 . ? 
C16 H27 0.9800 . ? 
C16 H28 0.9800 . ? 
C17 Si9 1.671(19) . ? 
C17 H29 0.9800 . ? 
C17 H30 0.9800 . ? 
C17 H31 0.9800 . ? 
C17 H32 0.9800 . ? 
C17 H33 0.9800 . ? 
C17 H34 0.9800 . ? 
C18 Si9 2.276(19) . ? 
C18 H35 0.9800 . ? 
C18 H36 0.9800 . ? 
C18 H37 0.9800 . ? 
C18 H38 0.9800 . ? 
C18 H39 0.9800 . ? 
C18 H40 0.9800 . ? 
C19 Si9 2.17(2) . ? 
C19 H41 0.9800 . ? 
C19 H42 0.9800 . ? 
C19 H43 0.9800 . ? 
C19 H44 0.9800 . ? 
C19 H45 0.9800 . ? 
C19 H46 0.9800 . ? 
C20 Si10 2.039(16) . ? 
C20 H47 0.9800 . ? 
C20 H48 0.9800 . ? 
C20 H49 0.9800 . ? 
C20 H50 0.9800 . ? 
C20 H51 0.9800 . ? 
C20 H52 0.9800 . ? 
C21 Si10 1.840(19) . ? 
C21 H53 0.9800 . ? 
C21 H54 0.9800 . ? 
C21 H55 0.9800 . ? 
C21 H56 0.9800 . ? 
C21 H57 0.9800 . ? 
C21 H58 0.9800 . ? 
C22 Si8 2.14(2) . ? 
C22 H59 0.9800 . ? 
C22 H60 0.9800 . ? 
C22 H61 0.9800 . ? 
C22 H62 0.9800 . ? 
C22 H63 0.9800 . ? 
C22 H64 0.9800 . ? 
C23 Si10 2.351(18) . ? 
C23 H65 0.9800 . ? 
C23 H66 0.9800 . ? 
C23 H67 0.9800 . ? 
C23 H68 0.9800 . ? 
C23 H69 0.9800 . ? 
C23 H70 0.9800 . ? 
C24 Si8 2.065(17) . ? 
C24 H71 0.9800 . ? 
C24 H72 0.9800 . ? 
C24 H73 0.9800 . ? 
C24 H74 0.9800 . ? 
C24 H75 0.9800 . ? 
C24 H76 0.9800 . ? 
C25 H77 0.9800 . ? 
C25 H78 0.9800 . ? 
C25 H79 0.9800 . ? 
C26 H80 0.9800 . ? 
C26 H81 0.9800 . ? 
C26 H82 0.9800 . ? 
C27 H83 0.9800 . ? 
C27 H84 0.9800 . ? 
C27 H85 0.9800 . ? 
C28 H86 0.9800 . ? 
C28 H87 0.9800 . ? 
C28 H88 0.9800 . ? 
C29 H89 0.9800 . ? 
C29 H90 0.9800 . ? 
C29 H91 0.9800 . ? 
C30 H92 0.9800 . ? 
C30 H93 0.9800 . ? 
C30 H94 0.9800 . ? 
C31 C36 1.381(6) . ? 
C31 C32 1.393(6) . ? 
C31 C37 1.505(6) . ? 
C32 C33 1.386(6) . ? 
C32 H95 0.9500 . ? 
C33 C34 1.372(7) . ? 
C33 H96 0.9500 . ? 
C34 C35 1.361(7) . ? 
C34 H97 0.9500 . ? 
C35 C36 1.375(6) . ? 
C35 H98 0.9500 . ? 
C36 H99 0.9500 . ? 
C37 H100 0.9800 . ? 
C37 H101 0.9800 . ? 
C37 H102 0.9800 . ? 
 
loop_ 
 _geom_angle_atom_site_label_1 
 _geom_angle_atom_site_label_2 
 _geom_angle_atom_site_label_3 
 _geom_angle 
 _geom_angle_site_symmetry_1 
 _geom_angle_site_symmetry_3 
 _geom_angle_publ_flag 
C1 Ge1 Br1 100.04(10) . . ? 
C1 Ge1 Ge1 127.34(10) . 3_657 ? 
Br1 Ge1 Ge1 105.21(2) . 3_657 ? 
C2 C1 C6 119.5(3) . . ? 
C2 C1 Ge1 124.8(2) . . ? 
C6 C1 Ge1 115.6(2) . . ? 
C3 C2 C1 118.8(3) . . ? 
C3 C2 C7 119.0(3) . . ? 
C1 C2 C7 122.2(3) . . ? 
C4 C3 C2 123.6(3) . . ? 
C4 C3 H1 118.2 . . ? 
C2 C3 H1 118.2 . . ? 
C3 C4 C5 116.0(3) . . ? 
C3 C4 C8 123.2(3) . . ? 
C5 C4 C8 120.9(3) . . ? 
C6 C5 C4 123.2(3) . . ? 
C6 C5 H2 118.4 . . ? 
C4 C5 H2 118.4 . . ? 
C5 C6 C1 118.8(3) . . ? 
C5 C6 C9 120.2(3) . . ? 
C1 C6 C9 120.9(3) . . ? 
C2 C7 Si2 114.0(2) . . ? 
C2 C7 Si1 110.7(2) . . ? 
Si2 C7 Si1 119.90(17) . . ? 
C2 C7 H3 103.3 . . ? 
Si2 C7 H3 103.3 . . ? 
Si1 C7 H3 103.3 . . ? 
C4 C8 Si8 106.8(6) . . ? 
C4 C8 Si10 112.9(6) . . ? 
Si8 C8 Si10 117.3(8) . . ? 
C4 C8 Si4 109.2(2) . . ? 
Si8 C8 Si4 143.0(6) . . ? 
Si10 C8 Si4 38.0(5) . . ? 
C4 C8 Si3 113.1(2) . . ? 
Si8 C8 Si3 64.6(5) . . ? 
Si10 C8 Si3 130.3(5) . . ? 
Si4 C8 Si3 107.85(17) . . ? 
C4 C8 Si5 107.3(2) . . ? 
Si8 C8 Si5 46.9(6) . . ? 
Si10 C8 Si5 75.4(6) . . ? 
Si4 C8 Si5 112.15(17) . . ? 
Si3 C8 Si5 107.27(17) . . ? 
C4 C8 Si9 110.1(5) . . ? 
Si8 C8 Si9 106.3(8) . . ? 
Si10 C8 Si9 103.2(8) . . ? 
Si4 C8 Si9 69.1(5) . . ? 
Si3 C8 Si9 42.7(5) . . ? 
Si5 C8 Si9 139.5(5) . . ? 
C6 C9 Si6 111.4(2) . . ? 
C6 C9 Si7 114.5(2) . . ? 
Si6 C9 Si7 118.79(17) . . ? 
C6 C9 H4 103.3 . . ? 
Si6 C9 H4 103.3 . . ? 
Si7 C9 H4 103.3 . . ? 
C10 Si1 C12 108.14(18) . . ? 
C10 Si1 C11 110.51(18) . . ? 
C12 Si1 C11 107.59(17) . . ? 
C10 Si1 C7 106.65(16) . . ? 
C12 Si1 C7 116.97(16) . . ? 
C11 Si1 C7 106.94(17) . . ? 
C15 Si2 C13 108.53(19) . . ? 
C15 Si2 C14 109.58(17) . . ? 
C13 Si2 C14 105.85(18) . . ? 
C15 Si2 C7 110.07(16) . . ? 
C13 Si2 C7 109.21(17) . . ? 
C14 Si2 C7 113.42(17) . . ? 
C18 Si3 C16 107.2(2) . . ? 
C18 Si3 C17 101.68(19) . . ? 
C16 Si3 C17 107.23(19) . . ? 
C18 Si3 C8 114.26(17) . . ? 
C16 Si3 C8 109.85(17) . . ? 
C17 Si3 C8 115.94(17) . . ? 
C21 Si4 C19 103.8(2) . . ? 
C21 Si4 C20 104.57(19) . . ? 
C19 Si4 C20 109.7(2) . . ? 
C21 Si4 C8 116.49(17) . . ? 
C19 Si4 C8 109.55(18) . . ? 
C20 Si4 C8 112.20(18) . . ? 
C24 Si5 C22 105.52(19) . . ? 
C24 Si5 C23 109.76(18) . . ? 
C22 Si5 C23 101.96(19) . . ? 
C24 Si5 C8 109.42(17) . . ? 
C22 Si5 C8 115.61(18) . . ? 
C23 Si5 C8 114.04(17) . . ? 
C25 Si6 C26 107.84(19) . . ? 
C25 Si6 C27 106.97(18) . . ? 
C26 Si6 C27 111.44(18) . . ? 
C25 Si6 C9 114.12(17) . . ? 
C26 Si6 C9 107.43(16) . . ? 
C27 Si6 C9 109.10(17) . . ? 
C30 Si7 C29 107.2(2) . . ? 
C30 Si7 C28 112.16(18) . . ? 
C29 Si7 C28 106.49(17) . . ? 
C30 Si7 C9 108.75(17) . . ? 
C29 Si7 C9 110.14(17) . . ? 
C28 Si7 C9 111.96(17) . . ? 
Si1 C10 H5 109.5 . . ? 
Si1 C10 H6 109.5 . . ? 
H5 C10 H6 109.5 . . ? 
Si1 C10 H7 109.5 . . ? 
H5 C10 H7 109.5 . . ? 
H6 C10 H7 109.5 . . ? 
Si1 C11 H8 109.5 . . ? 
Si1 C11 H9 109.5 . . ? 
H8 C11 H9 109.5 . . ? 
Si1 C11 H10 109.5 . . ? 
H8 C11 H10 109.5 . . ? 
H9 C11 H10 109.5 . . ? 
Si1 C12 H11 109.5 . . ? 
Si1 C12 H12 109.5 . . ? 
H11 C12 H12 109.5 . . ? 
Si1 C12 H13 109.5 . . ? 
H11 C12 H13 109.5 . . ? 
H12 C12 H13 109.5 . . ? 
Si2 C13 H14 109.5 . . ? 
Si2 C13 H15 109.5 . . ? 
H14 C13 H15 109.5 . . ? 
Si2 C13 H16 109.5 . . ? 
H14 C13 H16 109.5 . . ? 
H15 C13 H16 109.5 . . ? 
Si2 C14 H17 109.5 . . ? 
Si2 C14 H18 109.5 . . ? 
H17 C14 H18 109.5 . . ? 
Si2 C14 H19 109.5 . . ? 
H17 C14 H19 109.5 . . ? 
H18 C14 H19 109.5 . . ? 
Si2 C15 H20 109.5 . . ? 
Si2 C15 H21 109.5 . . ? 
H20 C15 H21 109.5 . . ? 
Si2 C15 H22 109.5 . . ? 
H20 C15 H22 109.5 . . ? 
H21 C15 H22 109.5 . . ? 
Si3 C16 Si8 62.4(5) . . ? 
Si3 C16 H23 109.5 . . ? 
Si8 C16 H23 93.5 . . ? 
Si3 C16 H24 109.5 . . ? 
Si8 C16 H24 157.0 . . ? 
H23 C16 H24 109.5 . . ? 
Si3 C16 H25 109.5 . . ? 
Si8 C16 H25 58.9 . . ? 
H23 C16 H25 109.5 . . ? 
H24 C16 H25 109.5 . . ? 
Si3 C16 H26 151.8 . . ? 
Si8 C16 H26 109.5 . . ? 
H23 C16 H26 97.6 . . ? 
H24 C16 H26 66.8 . . ? 
H25 C16 H26 51.8 . . ? 
Si3 C16 H27 98.5 . . ? 
Si8 C16 H27 109.5 . . ? 
H23 C16 H27 25.8 . . ? 
H24 C16 H27 92.7 . . ? 
H25 C16 H27 134.9 . . ? 
H26 C16 H27 109.5 . . ? 
Si3 C16 H28 55.6 . . ? 
Si8 C16 H28 109.5 . . ? 
H23 C16 H28 135.1 . . ? 
H24 C16 H28 55.1 . . ? 
H25 C16 H28 115.4 . . ? 
H26 C16 H28 109.5 . . ? 
H27 C16 H28 109.5 . . ? 
Si9 C17 Si3 48.4(6) . . ? 
Si9 C17 H29 113.0 . . ? 
Si3 C17 H29 109.5 . . ? 
Si9 C17 H30 62.8 . . ? 
Si3 C17 H30 109.5 . . ? 
H29 C17 H30 109.5 . . ? 
Si9 C17 H31 136.8 . . ? 
Si3 C17 H31 109.5 . . ? 
H29 C17 H31 109.5 . . ? 
H30 C17 H31 109.5 . . ? 
Si9 C17 H32 109.5 . . ? 
Si3 C17 H32 136.8 . . ? 
H29 C17 H32 113.7 . . ? 
H30 C17 H32 53.5 . . ? 
H31 C17 H32 57.7 . . ? 
Si9 C17 H33 109.5 . . ? 
Si3 C17 H33 62.8 . . ? 
H29 C17 H33 101.4 . . ? 
H30 C17 H33 148.8 . . ? 
H31 C17 H33 53.4 . . ? 
H32 C17 H33 109.5 . . ? 
Si9 C17 H34 109.5 . . ? 
Si3 C17 H34 113.0 . . ? 
H29 C17 H34 8.1 . . ? 
H30 C17 H34 101.4 . . ? 
H31 C17 H34 113.7 . . ? 
H32 C17 H34 109.5 . . ? 
H33 C17 H34 109.5 . . ? 
Si3 C18 Si9 40.3(5) . . ? 
Si3 C18 H35 109.5 . . ? 
Si9 C18 H35 70.0 . . ? 
Si3 C18 H36 109.5 . . ? 
Si9 C18 H36 131.5 . . ? 
H35 C18 H36 109.5 . . ? 
Si3 C18 H37 109.5 . . ? 
Si9 C18 H37 116.2 . . ? 
H35 C18 H37 109.5 . . ? 
H36 C18 H37 109.5 . . ? 
Si3 C18 H38 119.5 . . ? 
Si9 C18 H38 109.5 . . ? 
H35 C18 H38 66.7 . . ? 
H36 C18 H38 43.1 . . ? 
H37 C18 H38 129.3 . . ? 
Si3 C18 H39 69.4 . . ? 
Si9 C18 H39 109.5 . . ? 
H35 C18 H39 175.1 . . ? 
H36 C18 H39 67.1 . . ? 
H37 C18 H39 75.2 . . ? 
H38 C18 H39 109.5 . . ? 
Si3 C18 H40 128.4 . . ? 
Si9 C18 H40 109.5 . . ? 
H35 C18 H40 75.0 . . ? 
H36 C18 H40 117.2 . . ? 
H37 C18 H40 34.9 . . ? 
H38 C18 H40 109.5 . . ? 
H39 C18 H40 109.5 . . ? 
Si4 C19 Si9 68.4(5) . . ? 
Si4 C19 H41 109.5 . . ? 
Si9 C19 H41 44.9 . . ? 
Si4 C19 H42 109.5 . . ? 
Si9 C19 H42 107.4 . . ? 
H41 C19 H42 109.5 . . ? 
Si4 C19 H43 109.5 . . ? 
Si9 C19 H43 141.1 . . ? 
H41 C19 H43 109.5 . . ? 
H42 C19 H43 109.5 . . ? 
Si4 C19 H44 46.6 . . ? 
Si9 C19 H44 109.5 . . ? 
H41 C19 H44 133.2 . . ? 
H42 C19 H44 116.4 . . ? 
H43 C19 H44 63.7 . . ? 
Si4 C19 H45 145.0 . . ? 
Si9 C19 H45 109.5 . . ? 
H41 C19 H45 65.6 . . ? 
H42 C19 H45 104.5 . . ? 
H43 C19 H45 49.1 . . ? 
H44 C19 H45 109.5 . . ? 
Si4 C19 H46 103.7 . . ? 
Si9 C19 H46 109.5 . . ? 
H41 C19 H46 115.9 . . ? 
H42 C19 H46 7.1 . . ? 
H43 C19 H46 108.6 . . ? 
H44 C19 H46 109.5 . . ? 
H45 C19 H46 109.5 . . ? 
Si4 C20 Si10 36.6(5) . . ? 
Si4 C20 H47 109.5 . . ? 
Si10 C20 H47 120.5 . . ? 
Si4 C20 H48 109.5 . . ? 
Si10 C20 H48 126.0 . . ? 
H47 C20 H48 109.5 . . ? 
Si4 C20 H49 109.5 . . ? 
Si10 C20 H49 73.0 . . ? 
H47 C20 H49 109.5 . . ? 
H48 C20 H49 109.5 . . ? 
Si4 C20 H50 120.5 . . ? 
Si10 C20 H50 109.5 . . ? 
H47 C20 H50 32.2 . . ? 
H48 C20 H50 123.9 . . ? 
H49 C20 H50 77.3 . . ? 
Si4 C20 H51 73.0 . . ? 
Si10 C20 H51 109.5 . . ? 
H47 C20 H51 77.3 . . ? 
H48 C20 H51 61.7 . . ? 
H49 C20 H51 170.8 . . ? 
H50 C20 H51 109.5 . . ? 
Si4 C20 H52 126.0 . . ? 
Si10 C20 H52 109.5 . . ? 
H47 C20 H52 124.0 . . ? 
H48 C20 H52 47.8 . . ? 
H49 C20 H52 61.7 . . ? 
H50 C20 H52 109.5 . . ? 
H51 C20 H52 109.5 . . ? 
Si10 C21 Si4 39.2(5) . . ? 
Si10 C21 H53 70.5 . . ? 
Si4 C21 H53 109.5 . . ? 
Si10 C21 H54 127.6 . . ? 
Si4 C21 H54 109.5 . . ? 
H53 C21 H54 109.5 . . ? 
Si10 C21 H55 119.9 . . ? 
Si4 C21 H55 109.5 . . ? 
H53 C21 H55 109.5 . . ? 
H54 C21 H55 109.5 . . ? 
Si10 C21 H56 109.5 . . ? 
Si4 C21 H56 126.1 . . ? 
H53 C21 H56 62.6 . . ? 
H54 C21 H56 46.9 . . ? 
H55 C21 H56 123.7 . . ? 
Si10 C21 H57 109.5 . . ? 
Si4 C21 H57 70.4 . . ? 
H53 C21 H57 170.6 . . ? 
H54 C21 H57 62.7 . . ? 
H55 C21 H57 79.0 . . ? 
H56 C21 H57 109.5 . . ? 
Si10 C21 H58 109.5 . . ? 
Si4 C21 H58 121.5 . . ? 
H53 C21 H58 78.9 . . ? 
H54 C21 H58 122.1 . . ? 
H55 C21 H58 30.6 . . ? 
H56 C21 H58 109.5 . . ? 
H57 C21 H58 109.5 . . ? 
Si5 C22 Si8 43.4(5) . . ? 
Si5 C22 H59 109.5 . . ? 
Si8 C22 H59 117.8 . . ? 
Si5 C22 H60 109.5 . . ? 
Si8 C22 H60 131.0 . . ? 
H59 C22 H60 109.5 . . ? 
Si5 C22 H61 109.5 . . ? 
Si8 C22 H61 66.7 . . ? 
H59 C22 H61 109.5 . . ? 
H60 C22 H61 109.5 . . ? 
Si5 C22 H62 130.0 . . ? 
Si8 C22 H62 109.5 . . ? 
H59 C22 H62 120.3 . . ? 
H60 C22 H62 50.7 . . ? 
H61 C22 H62 59.1 . . ? 
Si5 C22 H63 118.9 . . ? 
Si8 C22 H63 109.5 . . ? 
H59 C22 H63 22.0 . . ? 
H60 C22 H63 119.3 . . ? 
H61 C22 H63 87.4 . . ? 
H62 C22 H63 109.5 . . ? 
Si5 C22 H64 66.5 . . ? 
Si8 C22 H64 109.5 . . ? 
H59 C22 H64 87.5 . . ? 
H60 C22 H64 59.2 . . ? 
H61 C22 H64 162.6 . . ? 
H62 C22 H64 109.5 . . ? 
H63 C22 H64 109.5 . . ? 
Si5 C23 Si10 66.2(4) . . ? 
Si5 C23 H65 109.5 . . ? 
Si10 C23 H65 56.2 . . ? 
Si5 C23 H66 109.5 . . ? 
Si10 C23 H66 91.9 . . ? 
H65 C23 H66 109.5 . . ? 
Si5 C23 H67 109.5 . . ? 
Si10 C23 H67 158.0 . . ? 
H65 C23 H67 109.5 . . ? 
H66 C23 H67 109.5 . . ? 
Si5 C23 H68 54.8 . . ? 
Si10 C23 H68 109.5 . . ? 
H65 C23 H68 111.0 . . ? 
H66 C23 H68 139.5 . . ? 
H67 C23 H68 57.1 . . ? 
Si5 C23 H69 155.9 . . ? 
Si10 C23 H69 109.5 . . ? 
H65 C23 H69 55.8 . . ? 
H66 C23 H69 94.1 . . ? 
H67 C23 H69 65.1 . . ? 
H68 C23 H69 109.5 . . ? 
Si5 C23 H70 93.8 . . ? 
Si10 C23 H70 109.5 . . ? 
H65 C23 H70 139.5 . . ? 
H66 C23 H70 30.1 . . ? 
H67 C23 H70 92.2 . . ? 
H68 C23 H70 109.5 . . ? 
H69 C23 H70 109.5 . . ? 
Si5 C24 Si8 44.6(5) . . ? 
Si5 C24 H71 109.5 . . ? 
Si8 C24 H71 116.0 . . ? 
Si5 C24 H72 109.5 . . ? 
Si8 C24 H72 65.8 . . ? 
H71 C24 H72 109.5 . . ? 
Si5 C24 H73 109.5 . . ? 
Si8 C24 H73 133.1 . . ? 
H71 C24 H73 109.5 . . ? 
H72 C24 H73 109.5 . . ? 
Si5 C24 H74 127.7 . . ? 
Si8 C24 H74 109.5 . . ? 
H71 C24 H74 122.5 . . ? 
H72 C24 H74 60.4 . . ? 
H73 C24 H74 49.1 . . ? 
Si5 C24 H75 65.0 . . ? 
Si8 C24 H75 109.5 . . ? 
H71 C24 H75 86.9 . . ? 
H72 C24 H75 163.5 . . ? 
H73 C24 H75 61.1 . . ? 
H74 C24 H75 109.5 . . ? 
Si5 C24 H76 121.6 . . ? 
Si8 C24 H76 109.5 . . ? 
H71 C24 H76 22.8 . . ? 
H72 C24 H76 86.8 . . ? 
H73 C24 H76 117.0 . . ? 
H74 C24 H76 109.5 . . ? 
H75 C24 H76 109.5 . . ? 
Si6 C25 H77 109.5 . . ? 
Si6 C25 H78 109.5 . . ? 
H77 C25 H78 109.5 . . ? 
Si6 C25 H79 109.5 . . ? 
H77 C25 H79 109.5 . . ? 
H78 C25 H79 109.5 . . ? 
Si6 C26 H80 109.5 . . ? 
Si6 C26 H81 109.5 . . ? 
H80 C26 H81 109.5 . . ? 
Si6 C26 H82 109.5 . . ? 
H80 C26 H82 109.5 . . ? 
H81 C26 H82 109.5 . . ? 
Si6 C27 H83 109.5 . . ? 
Si6 C27 H84 109.5 . . ? 
H83 C27 H84 109.5 . . ? 
Si6 C27 H85 109.5 . . ? 
H83 C27 H85 109.5 . . ? 
H84 C27 H85 109.5 . . ? 
Si7 C28 H86 109.5 . . ? 
Si7 C28 H87 109.5 . . ? 
H86 C28 H87 109.5 . . ? 
Si7 C28 H88 109.5 . . ? 
H86 C28 H88 109.5 . . ? 
H87 C28 H88 109.5 . . ? 
Si7 C29 H89 109.5 . . ? 
Si7 C29 H90 109.5 . . ? 
H89 C29 H90 109.5 . . ? 
Si7 C29 H91 109.5 . . ? 
H89 C29 H91 109.5 . . ? 
H90 C29 H91 109.5 . . ? 
Si7 C30 H92 109.5 . . ? 
Si7 C30 H93 109.5 . . ? 
H92 C30 H93 109.5 . . ? 
Si7 C30 H94 109.5 . . ? 
H92 C30 H94 109.5 . . ? 
H93 C30 H94 109.5 . . ? 
C8 Si8 C16 109.0(9) . . ? 
C8 Si8 C24 106.0(9) . . ? 
C16 Si8 C24 117.9(9) . . ? 
C8 Si8 C22 108.7(9) . . ? 
C16 Si8 C22 122.7(9) . . ? 
C24 Si8 C22 90.5(7) . . ? 
C17 Si9 C8 118.8(10) . . ? 
C17 Si9 C19 119.4(9) . . ? 
C8 Si9 C19 93.1(8) . . ? 
C17 Si9 C18 94.5(9) . . ? 
C8 Si9 C18 94.0(7) . . ? 
C19 Si9 C18 135.9(9) . . ? 
C21 Si10 C8 119.1(9) . . ? 
C21 Si10 C20 99.7(8) . . ? 
C8 Si10 C20 107.0(8) . . ? 
C21 Si10 C23 113.2(8) . . ? 
C8 Si10 C23 97.7(7) . . ? 
C20 Si10 C23 121.3(8) . . ? 
C36 C31 C32 117.8(4) . . ? 
C36 C31 C37 121.4(4) . . ? 
C32 C31 C37 120.8(4) . . ? 
C33 C32 C31 120.3(4) . . ? 
C33 C32 H95 119.8 . . ? 
C31 C32 H95 119.8 . . ? 
C34 C33 C32 120.6(4) . . ? 
C34 C33 H96 119.7 . . ? 
C32 C33 H96 119.7 . . ? 
C35 C34 C33 119.1(4) . . ? 
C35 C34 H97 120.4 . . ? 
C33 C34 H97 120.4 . . ? 
C34 C35 C36 121.0(4) . . ? 
C34 C35 H98 119.5 . . ? 
C36 C35 H98 119.5 . . ? 
C35 C36 C31 121.1(4) . . ? 
C35 C36 H99 119.5 . . ? 
C31 C36 H99 119.5 . . ? 
C31 C37 H100 109.5 . . ? 
C31 C37 H101 109.5 . . ? 
H100 C37 H101 109.5 . . ? 
C31 C37 H102 109.5 . . ? 
H100 C37 H102 109.5 . . ? 
H101 C37 H102 109.5 . . ? 
 
loop_ 
 _geom_torsion_atom_site_label_1 
 _geom_torsion_atom_site_label_2 
 _geom_torsion_atom_site_label_3 
 _geom_torsion_atom_site_label_4 
 _geom_torsion 
 _geom_torsion_site_symmetry_1 
 _geom_torsion_site_symmetry_2 
 _geom_torsion_site_symmetry_3 
 _geom_torsion_site_symmetry_4 
 _geom_torsion_publ_flag 
Br1 Ge1 C1 C2 78.4(3) . . . . ? 
Ge1 Ge1 C1 C2 -39.6(3) 3_657 . . . ? 
Br1 Ge1 C1 C6 -98.8(2) . . . . ? 
Ge1 Ge1 C1 C6 143.2(2) 3_657 . . . ? 
C6 C1 C2 C3 -2.8(5) . . . . ? 
Ge1 C1 C2 C3 -179.9(2) . . . . ? 
C6 C1 C2 C7 177.8(3) . . . . ? 
Ge1 C1 C2 C7 0.7(5) . . . . ? 
C1 C2 C3 C4 2.0(5) . . . . ? 
C7 C2 C3 C4 -178.5(3) . . . . ? 
C2 C3 C4 C5 0.2(5) . . . . ? 
C2 C3 C4 C8 -179.1(3) . . . . ? 
C3 C4 C5 C6 -1.7(5) . . . . ? 
C8 C4 C5 C6 177.6(3) . . . . ? 
C4 C5 C6 C1 0.9(5) . . . . ? 
C4 C5 C6 C9 -179.6(3) . . . . ? 
C2 C1 C6 C5 1.4(5) . . . . ? 
Ge1 C1 C6 C5 178.8(3) . . . . ? 
C2 C1 C6 C9 -178.0(3) . . . . ? 
Ge1 C1 C6 C9 -0.7(4) . . . . ? 
C3 C2 C7 Si2 69.3(4) . . . . ? 
C1 C2 C7 Si2 -111.3(3) . . . . ? 
C3 C2 C7 Si1 -69.5(3) . . . . ? 
C1 C2 C7 Si1 109.9(3) . . . . ? 
C3 C4 C8 Si8 76.9(7) . . . . ? 
C5 C4 C8 Si8 -102.4(7) . . . . ? 
C3 C4 C8 Si10 -152.8(7) . . . . ? 
C5 C4 C8 Si10 27.9(7) . . . . ? 
C3 C4 C8 Si4 -112.2(3) . . . . ? 
C5 C4 C8 Si4 68.6(4) . . . . ? 
C3 C4 C8 Si3 7.9(4) . . . . ? 
C5 C4 C8 Si3 -171.3(3) . . . . ? 
C3 C4 C8 Si5 126.1(3) . . . . ? 
C5 C4 C8 Si5 -53.2(4) . . . . ? 
C3 C4 C8 Si9 -38.1(7) . . . . ? 
C5 C4 C8 Si9 142.7(6) . . . . ? 
C5 C6 C9 Si6 78.8(4) . . . . ? 
C1 C6 C9 Si6 -101.7(3) . . . . ? 
C5 C6 C9 Si7 -59.5(4) . . . . ? 
C1 C6 C9 Si7 120.0(3) . . . . ? 
C2 C7 Si1 C10 -33.2(3) . . . . ? 
Si2 C7 Si1 C10 -169.2(2) . . . . ? 
C2 C7 Si1 C12 87.9(3) . . . . ? 
Si2 C7 Si1 C12 -48.1(3) . . . . ? 
C2 C7 Si1 C11 -151.4(2) . . . . ? 
Si2 C7 Si1 C11 72.6(2) . . . . ? 
C2 C7 Si2 C15 13.1(3) . . . . ? 
Si1 C7 Si2 C15 147.8(2) . . . . ? 
C2 C7 Si2 C13 132.2(3) . . . . ? 
Si1 C7 Si2 C13 -93.2(2) . . . . ? 
C2 C7 Si2 C14 -110.1(3) . . . . ? 
Si1 C7 Si2 C14 24.6(3) . . . . ? 
C4 C8 Si3 C18 -171.6(3) . . . . ? 
Si8 C8 Si3 C18 90.1(7) . . . . ? 
Si10 C8 Si3 C18 -15.1(8) . . . . ? 
Si4 C8 Si3 C18 -50.8(3) . . . . ? 
Si5 C8 Si3 C18 70.2(2) . . . . ? 
Si9 C8 Si3 C18 -76.6(7) . . . . ? 
C4 C8 Si3 C16 67.9(3) . . . . ? 
Si8 C8 Si3 C16 -30.4(7) . . . . ? 
Si10 C8 Si3 C16 -135.6(8) . . . . ? 
Si4 C8 Si3 C16 -171.28(18) . . . . ? 
Si5 C8 Si3 C16 -50.3(2) . . . . ? 
Si9 C8 Si3 C16 162.9(7) . . . . ? 
C4 C8 Si3 C17 -53.8(3) . . . . ? 
Si8 C8 Si3 C17 -152.1(7) . . . . ? 
Si10 C8 Si3 C17 102.7(8) . . . . ? 
Si4 C8 Si3 C17 67.0(2) . . . . ? 
Si5 C8 Si3 C17 -172.02(17) . . . . ? 
Si9 C8 Si3 C17 41.2(7) . . . . ? 
C4 C8 Si4 C21 -50.0(3) . . . . ? 
Si8 C8 Si4 C21 115.6(9) . . . . ? 
Si10 C8 Si4 C21 53.0(9) . . . . ? 
Si3 C8 Si4 C21 -173.26(19) . . . . ? 
Si5 C8 Si4 C21 68.8(2) . . . . ? 
Si9 C8 Si4 C21 -154.8(6) . . . . ? 
C4 C8 Si4 C19 67.4(3) . . . . ? 
Si8 C8 Si4 C19 -127.1(9) . . . . ? 
Si10 C8 Si4 C19 170.4(9) . . . . ? 
Si3 C8 Si4 C19 -55.9(2) . . . . ? 
Si5 C8 Si4 C19 -173.8(2) . . . . ? 
Si9 C8 Si4 C19 -37.5(6) . . . . ? 
C4 C8 Si4 C20 -170.4(2) . . . . ? 
Si8 C8 Si4 C20 -4.9(10) . . . . ? 
Si10 C8 Si4 C20 -67.5(9) . . . . ? 
Si3 C8 Si4 C20 66.3(2) . . . . ? 
Si5 C8 Si4 C20 -51.6(2) . . . . ? 
Si9 C8 Si4 C20 84.7(6) . . . . ? 
C4 C8 Si5 C24 -37.1(3) . . . . ? 
Si8 C8 Si5 C24 59.9(8) . . . . ? 
Si10 C8 Si5 C24 -147.0(5) . . . . ? 
Si4 C8 Si5 C24 -157.01(18) . . . . ? 
Si3 C8 Si5 C24 84.8(2) . . . . ? 
Si9 C8 Si5 C24 119.6(9) . . . . ? 
C4 C8 Si5 C22 -156.0(2) . . . . ? 
Si8 C8 Si5 C22 -59.0(8) . . . . ? 
Si10 C8 Si5 C22 94.1(6) . . . . ? 
Si4 C8 Si5 C22 84.1(2) . . . . ? 
Si3 C8 Si5 C22 -34.2(2) . . . . ? 
Si9 C8 Si5 C22 0.7(9) . . . . ? 
C4 C8 Si5 C23 86.2(3) . . . . ? 
Si8 C8 Si5 C23 -176.8(8) . . . . ? 
Si10 C8 Si5 C23 -23.7(6) . . . . ? 
Si4 C8 Si5 C23 -33.7(2) . . . . ? 
Si3 C8 Si5 C23 -151.89(17) . . . . ? 
Si9 C8 Si5 C23 -117.0(9) . . . . ? 
C6 C9 Si6 C25 -73.7(3) . . . . ? 
Si7 C9 Si6 C25 62.7(3) . . . . ? 
C6 C9 Si6 C26 45.8(3) . . . . ? 
Si7 C9 Si6 C26 -177.84(19) . . . . ? 
C6 C9 Si6 C27 166.8(2) . . . . ? 
Si7 C9 Si6 C27 -56.9(2) . . . . ? 
C6 C9 Si7 C30 -37.6(3) . . . . ? 
Si6 C9 Si7 C30 -172.6(2) . . . . ? 
C6 C9 Si7 C29 -154.8(3) . . . . ? 
Si6 C9 Si7 C29 70.2(2) . . . . ? 
C6 C9 Si7 C28 86.9(3) . . . . ? 
Si6 C9 Si7 C28 -48.1(2) . . . . ? 
C18 Si3 C16 Si8 -96.6(6) . . . . ? 
C17 Si3 C16 Si8 154.9(6) . . . . ? 
C8 Si3 C16 Si8 28.1(6) . . . . ? 
C18 Si3 C17 Si9 75.8(9) . . . . ? 
C16 Si3 C17 Si9 -171.8(9) . . . . ? 
C8 Si3 C17 Si9 -48.7(9) . . . . ? 
C16 Si3 C18 Si9 -167.7(7) . . . . ? 
C17 Si3 C18 Si9 -55.4(7) . . . . ? 
C8 Si3 C18 Si9 70.3(7) . . . . ? 
C21 Si4 C19 Si9 161.4(5) . . . . ? 
C20 Si4 C19 Si9 -87.3(5) . . . . ? 
C8 Si4 C19 Si9 36.3(6) . . . . ? 
C21 Si4 C20 Si10 -64.9(9) . . . . ? 
C19 Si4 C20 Si10 -175.7(9) . . . . ? 
C8 Si4 C20 Si10 62.2(8) . . . . ? 
C19 Si4 C21 Si10 -173.6(8) . . . . ? 
C20 Si4 C21 Si10 71.3(8) . . . . ? 
C8 Si4 C21 Si10 -53.1(8) . . . . ? 
C24 Si5 C22 Si8 -69.8(7) . . . . ? 
C23 Si5 C22 Si8 175.5(7) . . . . ? 
C8 Si5 C22 Si8 51.3(7) . . . . ? 
C24 Si5 C23 Si10 143.1(5) . . . . ? 
C22 Si5 C23 Si10 -105.4(5) . . . . ? 
C8 Si5 C23 Si10 20.0(5) . . . . ? 
C22 Si5 C24 Si8 72.1(8) . . . . ? 
C23 Si5 C24 Si8 -178.8(8) . . . . ? 
C8 Si5 C24 Si8 -52.9(8) . . . . ? 
C4 C8 Si8 C16 -80.0(8) . . . . ? 
Si10 C8 Si8 C16 152.2(8) . . . . ? 
Si4 C8 Si8 C16 114.3(9) . . . . ? 
Si3 C8 Si8 C16 28.2(5) . . . . ? 
Si5 C8 Si8 C16 -178.2(12) . . . . ? 
Si9 C8 Si8 C16 37.5(10) . . . . ? 
C4 C8 Si8 C24 47.9(9) . . . . ? 
Si10 C8 Si8 C24 -79.9(10) . . . . ? 
Si4 C8 Si8 C24 -117.8(8) . . . . ? 
Si3 C8 Si8 C24 156.0(10) . . . . ? 
Si5 C8 Si8 C24 -50.4(5) . . . . ? 
Si9 C8 Si8 C24 165.4(8) . . . . ? 
C4 C8 Si8 C22 144.0(6) . . . . ? 
Si10 C8 Si8 C22 16.2(11) . . . . ? 
Si4 C8 Si8 C22 -21.7(13) . . . . ? 
Si3 C8 Si8 C22 -107.9(8) . . . . ? 
Si5 C8 Si8 C22 45.8(5) . . . . ? 
Si9 C8 Si8 C22 -98.5(8) . . . . ? 
Si3 C16 Si8 C8 -29.7(6) . . . . ? 
Si3 C16 Si8 C24 -150.6(12) . . . . ? 
Si3 C16 Si8 C22 98.9(10) . . . . ? 
Si5 C24 Si8 C8 56.1(7) . . . . ? 
Si5 C24 Si8 C16 178.5(15) . . . . ? 
Si5 C24 Si8 C22 -53.6(5) . . . . ? 
Si5 C22 Si8 C8 -51.9(6) . . . . ? 
Si5 C22 Si8 C16 179.3(15) . . . . ? 
Si5 C22 Si8 C24 55.1(5) . . . . ? 
Si3 C17 Si9 C8 45.4(7) . . . . ? 
Si3 C17 Si9 C19 157.8(14) . . . . ? 
Si3 C17 Si9 C18 -51.6(5) . . . . ? 
C4 C8 Si9 C17 52.5(12) . . . . ? 
Si8 C8 Si9 C17 -62.8(13) . . . . ? 
Si10 C8 Si9 C17 173.2(11) . . . . ? 
Si4 C8 Si9 C17 156.0(12) . . . . ? 
Si3 C8 Si9 C17 -50.3(9) . . . . ? 
Si5 C8 Si9 C17 -103.9(11) . . . . ? 
C4 C8 Si9 C19 -73.8(6) . . . . ? 
Si8 C8 Si9 C19 170.9(7) . . . . ? 
Si10 C8 Si9 C19 46.9(8) . . . . ? 
Si4 C8 Si9 C19 29.8(4) . . . . ? 
Si3 C8 Si9 C19 -176.6(10) . . . . ? 
Si5 C8 Si9 C19 129.8(6) . . . . ? 
C4 C8 Si9 C18 149.8(4) . . . . ? 
Si8 C8 Si9 C18 34.5(9) . . . . ? 
Si10 C8 Si9 C18 -89.4(8) . . . . ? 
Si4 C8 Si9 C18 -106.6(6) . . . . ? 
Si3 C8 Si9 C18 47.0(5) . . . . ? 
Si5 C8 Si9 C18 -6.6(12) . . . . ? 
Si4 C19 Si9 C17 -156.5(12) . . . . ? 
Si4 C19 Si9 C8 -30.7(4) . . . . ? 
Si4 C19 Si9 C18 68.2(10) . . . . ? 
Si3 C18 Si9 C17 66.8(7) . . . . ? 
Si3 C18 Si9 C8 -52.6(5) . . . . ? 
Si3 C18 Si9 C19 -151.1(16) . . . . ? 
Si4 C21 Si10 C8 56.3(8) . . . . ? 
Si4 C21 Si10 C20 -59.5(6) . . . . ? 
Si4 C21 Si10 C23 170.2(12) . . . . ? 
C4 C8 Si10 C21 36.3(11) . . . . ? 
Si8 C8 Si10 C21 161.1(9) . . . . ? 
Si4 C8 Si10 C21 -55.8(8) . . . . ? 
Si3 C8 Si10 C21 -120.2(8) . . . . ? 
Si5 C8 Si10 C21 139.3(10) . . . . ? 
Si9 C8 Si10 C21 -82.5(10) . . . . ? 
C4 C8 Si10 C20 148.1(6) . . . . ? 
Si8 C8 Si10 C20 -87.1(10) . . . . ? 
Si4 C8 Si10 C20 55.9(6) . . . . ? 
Si3 C8 Si10 C20 -8.5(13) . . . . ? 
Si5 C8 Si10 C20 -108.9(8) . . . . ? 
Si9 C8 Si10 C20 29.3(10) . . . . ? 
C4 C8 Si10 C23 -85.7(6) . . . . ? 
Si8 C8 Si10 C23 39.1(9) . . . . ? 
Si4 C8 Si10 C23 -177.9(12) . . . . ? 
Si3 C8 Si10 C23 117.7(5) . . . . ? 
Si5 C8 Si10 C23 17.2(4) . . . . ? 
Si9 C8 Si10 C23 155.5(7) . . . . ? 
Si4 C20 Si10 C21 64.1(8) . . . . ? 
Si4 C20 Si10 C8 -60.4(7) . . . . ? 
Si4 C20 Si10 C23 -171.0(15) . . . . ? 
Si5 C23 Si10 C21 -145.1(9) . . . . ? 
Si5 C23 Si10 C8 -18.8(4) . . . . ? 
Si5 C23 Si10 C20 96.5(9) . . . . ? 
C36 C31 C32 C33 0.4(6) . . . . ? 
C37 C31 C32 C33 -179.9(4) . . . . ? 
C31 C32 C33 C34 -0.7(6) . . . . ? 
C32 C33 C34 C35 0.3(6) . . . . ? 
C33 C34 C35 C36 0.4(7) . . . . ? 
C34 C35 C36 C31 -0.7(7) . . . . ? 
C32 C31 C36 C35 0.3(6) . . . . ? 
C37 C31 C36 C35 -179.5(4) . . . . ? 
 
_diffrn_measured_fraction_theta_max    0.995 
_diffrn_reflns_theta_full              25.50 
_diffrn_measured_fraction_theta_full   0.995 
_refine_diff_density_max    0.799 
_refine_diff_density_min   -0.477 
_refine_diff_density_rms    0.079 
